# Supplementary material
Source: PubMed Central journal article supplement (PMC8016402)
Supplement: mmc1.pdf [file mmc1.pdf]

# THE LANCET Oncology

## Supplementary appendix

This appendix formed part of the original submission. We post it as supplied by the authors.

Supplement to: Waissengrin B, Agbarya A, Safadi E, Padova H, Wolf I. Short-term safety of the BNT162b2 mRNA COVID-19 vaccine in patients with cancer treated with immune checkpoint inhibitors. *Lancet Oncol* 2021; published online April 1. [http://dx.doi.org/10.1016/S1470-2045\(21\)00155-8](http://dx.doi.org/10.1016/S1470-2045(21)00155-8).

**Table 1:** Characteristics of patients treated with immune-checkpoint inhibitors (ICI) and received two doses of the BNT162b2 mRNA Covid-19 vaccine

|                                                     |                       | N = 134 (%) |
|-----------------------------------------------------|-----------------------|-------------|
| <b>Median Age (range)</b>                           |                       | 72 (29-93)  |
| <b>Gender</b>                                       | Male                  | 73 (55)     |
|                                                     | Female                | 61 (44)     |
| <b>Comorbidities</b>                                | Diabetes              | 42 (30.8)   |
|                                                     | Hypertension          | 81 (59.5)   |
|                                                     | Obesity               | 32 (23.5)   |
|                                                     | Dyslipidemia          | 59 (43.3)   |
|                                                     | Smoking               | 39 (28.6)   |
| <b>Cancer type</b>                                  | Lung                  | 66 (49.2)   |
|                                                     | Genito-urinary        | 15 (11.2)   |
|                                                     | Gastrointestinal      | 11 (8.2)    |
|                                                     | Melanoma              | 16 (11.9)   |
|                                                     | Others                | 26 (19.4)   |
| <b>Cancer Stage</b>                                 | Local                 | 27 (20.2)   |
|                                                     | Metastatic            | 107 (79.8)  |
| <b>Oncology treatment</b>                           | ICI only              | 97 (72.4)   |
|                                                     | ICI and chemotherapy  | 37 (27.6)   |
| <b>Previous immune-related side effects</b>         | Grade $\geq$ 2        | 47 (35)     |
|                                                     | Grade 0-1             | 87 (65)     |
| <b>Immunotherapy Treatment</b>                      | Pembrolizumab         | 74 (55.2)   |
|                                                     | Nivolumab             | 25 (18.6)   |
|                                                     | Nivolumab +Ipilimumab | 8 (5.9)     |
|                                                     | Atezolizumab          | 3 (2.2)     |
|                                                     | Durvalumab            | 15 (11.2)   |
|                                                     | Cemiplimab            | 9 (6.7)     |
| <b>Time on ICI-treatment, Median (range) months</b> | 8.7 (1- 44)           |             |

**Table 2:** Systemic Side Effects after second dose of vaccine

| Side Effect       | N=134 (%) |
|-------------------|-----------|
| Fatigue           | 45 (34)   |
| Headache          | 22 (16)   |
| Muscle Pain       | 46 (34)   |
| Fever             | 14 (10)   |
| Chills            | 14 (10)   |
| Flu like symptoms | 3 (2.2)   |
| GI Disturbance    | 14 (10)   |
